# Supplementary material
Source: PubMed Central journal article supplement (PMC4305023)
Supplement: NIHMS635022-supplement-1.pdf [file NIHMS635022-supplement-1.pdf]

## Table of contents

|                                                                  |           |
|------------------------------------------------------------------|-----------|
| <b>S1. Supplementary material and methods</b> .....              | <b>1</b>  |
| S1.1. BRCT mutation panel design.....                            | 1         |
| S1.2. BRCT mutation panel construction.....                      | 1         |
| S1.3. BRCT screen: two-hybrid assay.....                         | 2         |
| S1.4. BRCT screen: NHEJ assays.....                              | 2         |
| <b>S2. Supplementary Tables</b> .....                            | <b>4</b>  |
| Table S1. Yeast strains used in this study.....                  | 4         |
| Table S2. Dnl4 BRCT screening panel.....                         | 5         |
| Table S3. Fusion primers used to generate mutations.....         | 8         |
| <b>S3. Supplementary figures</b> .....                           | <b>11</b> |
| Figure S1. Dnl4 BRCT screening panel.....                        | 11        |
| Figure S2. BRCT screen methods.....                              | 14        |
| Figure S3. BRCT screen results.....                              | 15        |
| Figure S4. Correlation between precise and imprecise NHEJ.....   | 15        |
| Figure S5. Structural representation of Dnl4 BRCT mutations..... | 16        |
| Figure S6. Yeast two-hybrid assay control plates.....            | 16        |
| Figure S7. Imprecise joints in the suicide deletion assay.....   | 18        |
| <b>S4. Supplementary references</b> .....                        | <b>19</b> |

## S1. Supplementary material and methods

### S1.1. BRCT mutation panel design

Primary sequence alignments of the Dnl4 BRCT region across various species were made using ClustalW (1), MACAW (2) and manual editing to judge positions which were invariant or where residue properties such as charge or hydrophobicity were conserved (Figure S1A). Structural alignments of human (3) and yeast (4) crystal structures (Figure S1B), in which the tandem LIG4/Dnl4 BRCT domains were bound to the coiled-coil domain of XRCC4/Lif1, were taken as supplied by NCBI VAST (5) and visualized using Cn3D (6). Mutant Dnl4 BRCT constructs (Figure S1, Table S2) were designed to encompass as many conserved residues as possible in a panel that would fit into a single 96-well plate, which was achieved by combining some mutations into compound double point mutations.

### S1.2. BRCT mutation panel construction

To screen a large number of Dnl4 BRCT domain mutations, we adopted a gap repair strategy (Figure S2) similar to the one previously used to create two-hybrid constructs (7). Two separate BRCT region PCR products were made for each target mutation that overlapped at their internal

ends that bore the new mutation as part of the corresponding PCR primers (see Table S3 for sequences). These two PCR products were co-transformed into yeast with a *Sma*I-linearized plasmid such that the overlap between the PCR products drove three-way gap repair and reconstituted a complete mutated BRCT domain in the plasmid. The low efficiency of blunt plasmid recircularization by NHEJ and high efficiency of gap repair led to very high fragment incorporation rates in transformants. PCR products were not purified from template DNA prior to gap repair in order to avoid excessive handling. Thus, the pool of transformants contained low levels of gap repair resulting from wild-type BRCT template DNA, estimated to be approximately 1%. PCR reactions, transformations and most downstream steps were handled in 96-well plates with the assistance of a robotic pipettor. At the end of transformation by the LiAc protocol (8,9), bulk yeast in LiAc/PEG solution were diluted 100-fold into liquid selective medium and allowed to recover for two days prior to further handling.

### **S1.3. BRCT screen: two-hybrid assay**

For determination of Lif1 interaction, BRCT region gap repair was performed using yeast strain YW740 and the two-hybrid bait plasmid pOBD2 (10). The transformant pool was recovered in -Trp medium and mated in bulk to yeast strain YW624 bearing the two-hybrid bait prey pOAD-Lif1(137-265) (7). Following limiting dilution spotting, three individual diploid colonies for each mutant were picked, expanded, and plated to -Leu-Trp control plates and -His and -Ade two-hybrid indicator plates. After 3 days, Dnl4(651-944)–Lif1(137-265) interaction was scored on a scale from 0 (no detectable interaction) to 3 (equivalent to wild-type). When only one of three colonies was scored as 3, that colony was inferred to be a likely wild-type contaminant and the screen score was determined from the remaining clones.

### **S1.4. BRCT screen: NHEJ assays**

For determination of NHEJ efficiency, the gap repair target plasmid, pTW671, contained the native *DNL4* promoter and coding sequence corresponding to amino acids 1 to 681 and the *HDF1* terminator in the *LEU2*-selected pTW435 backbone (7), such that gap repair with the mutated BRCT region PCR products restored full-length *DNL4*. The yeast strain, YW1657, was a *dnl4*Δ derivative of YW1276, which bears the previously described HO(+1) suicide deletion assay (7,11). In this assay, precise NHEJ yields a frame-shifted *ADE2* reporter gene and Ade<sup>-</sup>/red yeast, while imprecise NHEJ by the high frequency +CA imprecise joint restores the *ADE2* reading frame and yields Ade<sup>+</sup>/white yeast. Precise NHEJ was scored by plating the expanded transformant pools, without cloning, to parallel glucose -Leu and galactose -Leu plates and

scoring fractional survival on galactose (“exp” in Figure S3) relative to glucose (“ctl”). Imprecise NHEJ as a fraction of all *ADE2* locus repair was scored by diluting the expanded transformant pools 100-fold into liquid galactose -Leu medium to allow DSB induction and repair to occur, followed by plating to parallel glucose -Leu and glucose -Leu-Ade plates and scoring fractional survival on -Leu-Ade (“exp”) relative to -Leu (“ctl”). Final results were expressed as a percentage of wild-type NHEJ determined from the silent mutations.

## S2. Supplementary Tables

**Table S1. Yeast strains used in this study**

| <b>Strain</b> | <b>Genotype</b>                                                                                                      |
|---------------|----------------------------------------------------------------------------------------------------------------------|
| YW1657        | <i>MATα ade2::HOSD(+1)::STE3-MET15 dnl4Δ::URA3 his3Δ1 leu2Δ0 lys2Δ0 met15Δ0 ura3Δ0</i>                               |
| YW1228        | <i>MATα ade2::SD2::STE3-MET15 his3Δ1 leu2Δ0 met15Δ0 ura3Δ0</i>                                                       |
| YW1230        | YW1228 <i>dnl4Δ::KanMX4</i>                                                                                          |
| YW2045        | YW1228 <i>dnl4-D800K</i>                                                                                             |
| YW2047        | YW1228 <i>dnl4-GG(868:869)AA</i>                                                                                     |
| YW2048        | YW1228 <i>dnl4-KTT(742:744)ATA</i>                                                                                   |
| YW2051        | YW1228 <i>dnl4-L750*</i>                                                                                             |
| YW2052        | YW1228 <i>dnl4-F836*</i>                                                                                             |
| YW2053        | YW1228 <i>dnl4-D796*</i>                                                                                             |
| YW2218        | YW1228 <i>dnl4-D800K, dnl4-GG(868:869)AA</i>                                                                         |
| YW2299        | YW1228 <i>dnl4-K742A</i>                                                                                             |
| YW2300        | YW1228 <i>dnl4-T744A</i>                                                                                             |
| YW2083        | <i>MATα ade2-M7 his3Δ200 leu2- lys2-801 trp1Δ63 ura3-52</i>                                                          |
| YW1993        | <i>MATα-inc::AmpR-35S can1Δ::Gal1HO-QPCR DNL4-13Myc::HisMX6 GAL 1prm -HOcs gal1::HO his3Δ1 leu2Δ0 met15Δ0 ura3Δ0</i> |
| YW2036        | YW1993 <i>dnl4-D800K-13Myc::HisMX6</i>                                                                               |
| YW2038        | YW1993 <i>dnl4-GG(868:869)AA-13Myc::HisMX6</i>                                                                       |
| YW2039        | YW1993 <i>dnl4-KTT(742:744)ATA-13Myc::HisMX6</i>                                                                     |
| YW2219        | YW1993 <i>dnl4-D800K, GG(868:869)AA -13Myc::HisMX6</i>                                                               |
| YW2301        | YW1993 <i>dnl4-K742A-13Myc::HisMX6</i>                                                                               |
| YW2302        | YW1993 <i>dnl4-T744A-13Myc::HisMX6</i>                                                                               |
| YW2121        | YW1993 <i>lif1Δ::KanMX4</i>                                                                                          |
| YW2122        | YW1993 <i>nej1Δ::KanMX4</i>                                                                                          |
| YW2166        | <i>MATα-inc::AmpR-35S can1Δ::GAL 1-QPCR LIF1-13Myc::hisMX6 GAL 1prm-HOcs gal1::HO his3Δ1 leu2Δ0 met15Δ0 ura3Δ0</i>   |
| YW2167        | YW2166 <i>dnl4Δ::kanMX4</i>                                                                                          |
| YW2214        | YW2166 <i>dnl4-D800K</i>                                                                                             |
| YW2215        | YW2166 <i>dnl4-GG(868:869)AA</i>                                                                                     |
| YW2216        | YW2166 <i>dnl4-KTT(742:744)ATA</i>                                                                                   |
| YW2217        | YW2166 <i>dnl4-L750*</i>                                                                                             |

**Table S2. Dnl4 BRCT screening panel**

For each screening mutation or control construct (Figure S1), NHEJ values are tabulated as the average across two replicates while the two-hybrid result is the composite call after considering all replicates (see Figure S3 and Supplementary Materials and Methods). Two-hybrid scores range from 0 (no detectable interaction) to 3 (equivalent to wild-type). Mutations are sorted by position except for the controls in the top six rows.

| <b>Mutation</b>        | <b>Precise NHEJ (%WT)</b> | <b>Imprecise NHEJ (%WT)</b> | <b>Two-hybrid Score</b> |
|------------------------|---------------------------|-----------------------------|-------------------------|
| <b>L750L (=wt)</b>     | 89.5                      | 112.5                       | 3                       |
| <b>S813S (=wt)</b>     | 113                       | 110                         | 3                       |
| <b>Q875Q (=wt)</b>     | 95.5                      | 76.5                        | 3                       |
| <b>L750*</b>           | 15.5                      | 0                           | 0                       |
| <b>A789*</b>           | 19                        | 2                           | 0                       |
| <b>F836*</b>           | 89.5                      | 31                          | 1                       |
| <b>F686A</b>           | 107                       | 72.5                        | 0                       |
| <b>G688A</b>           | 101.5                     | 88                          | 2                       |
| <b>L689A</b>           | 99                        | 79                          | 3                       |
| <b>SD(695:696)AA</b>   | 43                        | 67                          | 1                       |
| <b>Y697A</b>           | 102                       | 63.5                        | 3                       |
| <b>TG(702:703)AA</b>   | 72.5                      | 114                         | 3                       |
| <b>RIT(705:707)AIA</b> | 105                       | 102                         | 3                       |
| <b>I706A</b>           | 155                       | 141                         | 3                       |
| <b>RAE(708:710)AAA</b> | 120.5                     | 102.5                       | 3                       |
| <b>E712A</b>           | 142.5                     | 113.5                       | 3                       |
| <b>IV(715:716)AA</b>   | 129.5                     | 81                          | 1                       |
| <b>GG(719:720)AA</b>   | 94.5                      | 64                          | 0                       |
| <b>GK(720:721)AA</b>   | 115                       | 96.5                        | 1                       |
| <b>LI(722:723)AA</b>   | 98.5                      | 45                          | 3                       |
| <b>N725A</b>           | 114                       | 59                          | 3                       |
| <b>L728A</b>           | 74.5                      | 83                          | 3                       |
| <b>K729A</b>           | 209.5                     | 96.5                        | 3                       |
| <b>R737A</b>           | 144.5                     | 89                          | 1                       |
| <b>SC(740:741)AA</b>   | 124                       | 117                         | 3                       |
| <b>K742E</b>           | 35.5                      | 36.5                        | 3                       |
| <b>KTT(742:744)ATA</b> | 8.5                       | 0                           | 2                       |
| <b>EC(746:747)AA</b>   | 42                        | 56                          | 3                       |
| <b>CK(747:748)AA</b>   | 116.5                     | 85                          | 3                       |
| <b>LI(750:751)AA</b>   | 13                        | 0                           | 3                       |
| <b>DR(752:753)AA</b>   | 106                       | 101                         | 3                       |
| <b>R753E</b>           | 61.5                      | 42                          | 3                       |

| Mutation        | Precise NHEJ (%WT) | Imprecise NHEJ (%WT) | Two-hybrid Score |
|-----------------|--------------------|----------------------|------------------|
| GYD(754:756)AYA | 169.5              | 115                  | 0                |
| Y755A           | 59                 | 97                   | 3                |
| D756K           | 105.5              | 47.5                 | 0                |
| HP(759:760)AA   | 90                 | 27                   | 2                |
| W762A           | 136.5              | 94                   | 0                |
| D765K           | 106                | 137                  | 3                |
| DC(765:766)AA   | 85                 | 105                  | 1                |
| Y769A           | 109.5              | 74                   | 3                |
| K770A           | 98                 | 69                   | 3                |
| L772A           | 114.5              | 97                   | 3                |
| I775A           | 89.5               | 80.5                 | 3                |
| E776K           | 84                 | 99                   | 0                |
| EP(776:777)AA   | 88                 | 100.5                | 0                |
| YCF(779:781)ACA | 97                 | 101.5                | 0                |
| CFN(780:782)AFA | 86.5               | 100                  | 3                |
| FNV(781:783)ANA | 134.5              | 108.5                | 0                |
| NVS(782:784)AVA | 109.5              | 111.5                | 3                |
| EK(792:793)AA   | 89.5               | 88.5                 | 3                |
| RVD(794:796)AVA | 34.5               | 21                   | 0                |
| V795A           | 143.5              | 98                   | 3                |
| D796K           | 91                 | 48.5                 | 0                |
| GD(799:800)AA   | 73.5               | 50.5                 | 0                |
| D800K           | 61                 | 46                   | 0                |
| SFE(801:803)AFA | 74                 | 87                   | 1                |
| F802A           | 93.5               | 81.5                 | 0                |
| I806A           | 113.5              | 96                   | 3                |
| SE(807:808)AA   | 125                | 73                   | 3                |
| L811A           | 149.5              | 87                   | 2                |
| S812A           | 143.5              | 73                   | 3                |
| SQ(817:818)AA   | 149                | 99                   | 3                |
| D830K           | 135                | 78                   | 2                |
| DSE(830:832)ASA | 85.5               | 116.5                | 2                |
| P837A           | 102                | 65.5                 | 1                |
| LF(838:839)AA   | 135.5              | 100                  | 0                |
| LF(840:841)AA   | 52.5               | 16                   | 0                |
| R844A           | 74                 | 61.5                 | 1                |
| IAY(845:847)AAA | 65                 | 76                   | 0                |
| P849A           | 130.5              | 70.5                 | 2                |
| KIK(863:865)AIA | 67                 | 78.5                 | 0                |
| IKL(864:866)AKA | 103                | 98                   | 0                |
| LF(866:867)AA   | 81.5               | 56                   | 0                |
| GG(868:869)AA   | 51                 | 85                   | 0                |

| <b>Mutation</b>        | <b>Precise NHEJ (%WT)</b> | <b>Imprecise NHEJ (%WT)</b> | <b>Two-hybrid Score</b> |
|------------------------|---------------------------|-----------------------------|-------------------------|
| <b>KIT(870:872)AIA</b> | 103                       | 73                          | 1                       |
| <b>L877A</b>           | 116.5                     | 71.5                        | 3                       |
| <b>CN(878:879)AA</b>   | 108                       | 60.5                        | 0                       |
| <b>P884A</b>           | 104                       | 76.5                        | 1                       |
| <b>P888A</b>           | 59                        | 117                         | 2                       |
| <b>KD(892:893)AA</b>   | 85                        | 92.5                        | 3                       |
| <b>PK(913:914)AA</b>   | 99                        | 67                          | 3                       |
| <b>I915A</b>           | 74.5                      | 118.5                       | 3                       |
| <b>R917A</b>           | 70                        | 41.5                        | 3                       |
| <b>PE(921:922)AA</b>   | 105                       | 68                          | 3                       |
| <b>WV(923:924)AA</b>   | 53                        | 12.5                        | 0                       |
| <b>DHS(925:927)AHA</b> | 88                        | 74.5                        | 0                       |
| <b>I928A</b>           | 106.5                     | 70                          | 0                       |
| <b>NCQ(931:933)ACA</b> | 92.5                      | 78                          | 1                       |
| <b>V934A</b>           | 46                        | 49                          | 3                       |
| <b>PE(935:936)AA</b>   | 67                        | 115.5                       | 1                       |
| <b>EED(936:938)KRK</b> | 60                        | 36                          | 0                       |
| <b>ED(937:938)AA</b>   | 47.5                      | 61.5                        | 3                       |
| <b>DFP(938:940)AFA</b> | 82.5                      | 85.5                        | 3                       |
| <b>FPV(939:941)APA</b> | 69                        | 88                          | 0                       |

**Table S3. Fusion primers used to generate mutations**

Fusion primers are the internal primers that bore the mutations in Figure S2

| Mutation               | Forward                                   | Reverse                                 |
|------------------------|-------------------------------------------|-----------------------------------------|
| <b>L750L (=wt)</b>     | TGCAAGGCTCTCATAGATCGAGGATATGATATATTG      | CGATCTATGAGAGCCTTGCAATCCGTGGTAG         |
| <b>S813S (=wt)</b>     | CAAACGTGCATCCTTGATATAAATCACAACCTAAGTCTA   | ATTTATACAAGGATGACAGTTTGGTTTCCGAAATG     |
| <b>Q875Q (=wt)</b>     | AACAGATCAACAATCACTTTGTAACCTAATAATTATAC    | TACAAAGTGATTGTTGATCTGTTATTTTCCACCAA     |
| <b>L750*</b>           | TGCAAGGCTTGAATAGATCGAGGATATGATATATTG      | TCGATCTATTCAAGCCTTGCAATCCGTGGTAG        |
| <b>A789*</b>           | AAAAATGAGATGAGTCGCTGAAAAAGGGTAGAT         | TTCAGCGACTCATCTCATTTTTTTGAGAGACGTAA     |
| <b>F836*</b>           | GTTTCGGCGGTGACCATTATTTTTATTCTCCAACAG      | AATAATGGTCACCGCCGAACCTCAGAATCT          |
| <b>F686A</b>           | TCAAACATCGCAGCCGATTACTTTTTTATGTTC         | AATCCGGCTGCGATGTTTGAATTTGGCAGTTGT       |
| <b>G688A</b>           | CATCTTTGCCGATTACTTTTTTATGTTCTCTCTGAC      | AAAAAGTAATGCGGCAAAGATGTTTGAATTTGGC      |
| <b>L689A</b>           | CTTTGCCGAGCACTTTTTTATGTTCTCTCTGACTA       | ATAAAAAAGTGCTCCGGCAAAGATGTTTGAATTT      |
| <b>SD(695:696)AA</b>   | ATGTTCTCGCAGCATATGTCACGGAGGACACTGG        | TGACATATGCTGCGAGAACATAAAAAAGTAATCCGG    |
| <b>Y697A</b>           | TCTCTGACGCAGTCACGGAGGACACTGGAA            | TCCGTGACTGCGTCAGAGAGAACATAAAAAAGTA      |
| <b>TG(702:703)AA</b>   | GGAGGACGCAGCAATACGGATTACACGGGCAGA         | CCGTATTGCTGCGTCTCCGTGACATAGTCAG         |
| <b>RIT(705:707)AIA</b> | GAATAGCAATCGCACGGCAGAACTTGAAAAAAGT        | GCCCGTGCGATTGCTATTCCAGTGCTCTCCGTGA      |
| <b>I706A</b>           | GAATACGGGCAACACGGGCAGAACTTGAAAAA          | GCCCGTGTTGCCGTATTCCAGTGCTCTCC           |
| <b>RAE(708:710)AAA</b> | ATTACAGCAGCAGCACTTGAAAAAAGTATTGTGGAACA    | TTCAAGTGCTGCTGCTGTAATCCGTATTCCAGTGTC    |
| <b>E712A</b>           | GGCAGAACTTGCAAAAAGTATTGTGGAACATGGTG       | AATAGTTTTTGCAAGTTCTGCCCGTGAATCC         |
| <b>IV(715:716)AA</b>   | GAAAAAAGTGCAGCAGAACATGGTGGTAAACTGATAT     | CATGTTCTGCTGCAGTTTTTTCAAGTTCTGCCCG      |
| <b>GG(719:720)AA</b>   | TGGAACATGCAGCAAAAGTATATAATGTAATTTTAAAA    | TCAGTTTTGCTGCATGTTCCACAATAGTTTTTTCAAG   |
| <b>GK(720:721)AA</b>   | AACATGGTGCAGCACTGATATATAATGTAATTTTAAAAACG | ATATCAGTGCTGCACCATGTTCCACAATAGTTTTTT    |
| <b>LI(722:723)AA</b>   | GGTGGTAAAGCAGCATATAATGTAATTTTAAAACGTCATTC | CATTATATGCTGCTTTACCACCATGTTCCACAATA     |
| <b>N725A</b>           | AACTGATATATGCAGTAATTTTAAAACGTCATTCAATTG   | TTTTAAAATTACTGCATATATCAGTTTACCACCATGTT  |
| <b>L728A</b>           | ATAATGTAATTGCAAAACGTCATTCAATTGGGGAC       | AATGACGTTTTGCAATTACATTATATATCAGTTTACCA  |
| <b>K729A</b>           | TGTAATTTTAGCACGTCATTCAATTGGGGACGT         | TTGAATGACGTGCTAAAATTACATTATATATCAGTTTAC |
| <b>R737A</b>           | GGGGACGTTGCATTAATCAGCTGTAAAAGTACCAC       | CTGATTAATGCAACGTCACCAATGAAATGACG        |
| <b>SC(740:741)AA</b>   | CGGTTAATCGCAGCAAAAGTACCACGGAATGCAAG       | TAGTTTTTGCTGCGATTAACCGAACGTCACCAA       |
| <b>K742E</b>           | ATCAGCTGTGAGACTACCACGGAATGCAAGGC          | GTGGTAGTCTCAGCTGATTAACCGAACGTC          |
| <b>KTT(742:744)ATA</b> | GCTGTGCAACCGCAACGGAATGCAAGGCTTTAATAG      | CCGTTGCGGTTGCACAGCTGATTAACCGAACGTC      |
| <b>EC(746:747)AA</b>   | TACCACGGCAGCAAAAGGCTTTAATAGATCGAGGAT      | AGCCTTTGCTGCCGTGGTAGTTTTACAGCTGAT       |
| <b>CK(747:748)AA</b>   | CCACGGAAGCAGCAGCTTTAATAGATCGAGGATATG      | TAAAGCTGCTGCTCCGTGGTAGTTTTACAGCT        |
| <b>LI(750:751)AA</b>   | CAAGGCTGCAGCAGATCGAGGATATGATATATTGC       | TCGATCTGCTGCAGCCTTGCAATCCGTGGTAG        |
| <b>DR(752:753)AA</b>   | GCTTTAATAGCAGCAGGATATGATATATTGCACCCAA     | CATATCCTGCTGCTATTAAAGCCTTGCAATCCGTG     |
| <b>R753E</b>           | CTTTAATAGATGAGGGATATGATATATTGCACCCAA      | TATCATATCCCTCATCTATTAAAGCCTTGCAATCC     |
| <b>GYD(754:756)AYA</b> | GATCGAGCATAACGAATATTGCACCCAAATGGGTAC      | CAATATTGCGTATGCTCGATCTATTAAAGCCTTGCAAT  |
| <b>Y755A</b>           | GATCGAGGAGCAGATATATTGCACCCAAATGGG         | CAATATATCTGCTCCTCGATCTATTAAAGCCTTG      |
| <b>D756K</b>           | TCGAGGATATAAGATATTGCACCCAAATGGGTAC        | GTGCAATATCTTATATCCTCGATCTATTAAAGCC      |
| <b>HP(759:760)AA</b>   | GATATATTGGCAGCAAAATGGGTACTCGATTGTATAG     | CCCAATTTGCTGCCAATATATCATATCCTCGATCTA    |
| <b>W762A</b>           | CACCCAAATGCAGTACTCGATTGTATAGCATATAA       | TCGAGTACTGCATTTGGGTGCAATATATCATATC      |
| <b>D765K</b>           | TGGGTACTCAAGTGTATAGCATATAAGAGGCTCA        | TGCTATACACTGAGTACCAATTTGGGTGCA          |



| Mutation               | Forward                                    | Reverse                                   |
|------------------------|--------------------------------------------|-------------------------------------------|
| <b>DC(765:766)AA</b>   | GGGTACTCGCAGCAATAGCATATAAGAGGCTCATCC       | TGCTATTGCTGCGAGTACCCAATTTGGGTGCA          |
| <b>Y769A</b>           | TGTATAGCAGCAAAGAGGCTCATCCTGATCGA           | GAGCCTCTTTGCTGCTATAACAATCGAGTACCCA        |
| <b>K770A</b>           | ATAGCATATGCAAGGCTCATCCTGATCGAGC            | GATGAGCCTTGCCATATGCTATAACAATCGAGTACC      |
| <b>L772A</b>           | TATAAGAGGGCAATCCTGATCGAGCCCAATTAT          | GATCAGGATTGCCCTCTTATATGCTATAACAATCG       |
| <b>I775A</b>           | TCATCCTGGCAGAGCCCAATTATTGCTTTAACG          | TTGGGCTCTGCCAGGATGAGCCTCTTATATGC          |
| <b>E776K</b>           | CATCCTGATCAAGCCCAATTATTGCTTTAACGTCT        | ATAATTGGGCTTGATCAGGATGAGCCTCTTATA         |
| <b>EP(776:777)AA</b>   | ATCCTGATCGCAGCAAAATTATTGCTTTAACGTCTCTCA    | AATAATTTGCTGCGATCAGGATGAGCCTCTTATA        |
| <b>YCF(779:781)ACA</b> | CCCAATGCATGCGCAAACGTCTCTCAAAAAATGAGAG      | ACGTTTGCGCATGCATTGGGCTCGATCAGGATGA        |
| <b>CFN(780:782)AFA</b> | CAATTATGCATTCGCAGTCTCTCAAAAAATGAGAGCC      | AGAGACTGCGAATGCATAATTGGGCTCGATCAGGAT      |
| <b>FNV(781:783)ANA</b> | TATTGCGCAAACGCATCTCAAAAAATGAGAGCCGTC       | TTGAGATGCGTTTGCGCAATAATTGGGCTCGATCAG      |
| <b>NVS(782:784)AVA</b> | TGCTTTGCAGTCGCACAAAAAATGAGAGCCGTCGC        | TTTTTGTGCGACTGCAAAGCAATAATTGGGCTCGATC     |
| <b>EK(792:793)AA</b>   | CGTCGCTGCAGCAAGGGTAGATTGTTGGGTGAT          | ACCCTTGCTGCAGCGACGGCTCTCATTTTTTTG         |
| <b>RVD(794:796)AVA</b> | GAAAAAGCAGTCGCATGTTTGGGTGATAGTTTTGAAA      | CAAACATGCGACTGCTTTTTTCAGCGACGGCTCTCA      |
| <b>V795A</b>           | TGAAAAAGGGCAGATTGTTTGGGTGATAGTTTTG         | CAAACAATCTGCCCTTTTTTCAGCGACGGCTC          |
| <b>D796K</b>           | AAAAAGGGTAAAGTGTTTGGGTGATAGTTTTGAAA        | ACCCAAACACTTTACCCTTTTTTCAGCGACGG          |
| <b>GD(799:800)AA</b>   | GATTGTTTGGCAGCAAGTTTTGAAAATGACATTTCCGGA    | CAAACCTTGCTGCCAAACAATCTACCCTTTTTTCAG      |
| <b>D800K</b>           | TTGTTTGGGTAAGAGTTTTGAAAATGACATTTCCGGA      | TTTCAAAACTCTTACCCAAACAATCTACCCTTTTT       |
| <b>SFE(801:803)AFA</b> | GGTGATGCATTCGCAAATGACATTTCCGAAACCAAAC      | GTCATTTGCGAATGCATCACCCAAACAATCTACCCT      |
| <b>F802A</b>           | GGTGATAGTGCAGAAAATGACATTTCCGAAACCA         | GTCATTTTCTGCACTATCACCCAAACAATCTACC        |
| <b>I806A</b>           | GAAAATGACGCATCGGAAACCAAACGTGCATCA          | GGTTTCCGATGCGTCATTTTTCAAACACTATCACCC      |
| <b>SE(807:808)AA</b>   | ATGACATTCAGCAACCAAACACTGTATCATTTGTATAA     | GTTTGGTTGCTGCAATGTCATTTTTCAAACACTATCACCC  |
| <b>L811A</b>           | GGAAACCAAAGCATCATCATTTGTATAAAATCACAACATA   | CAATGATGATGCTTTGGTTTTCCGAAATGTCATTTT      |
| <b>S812A</b>           | AACCAAACACTGGCATCATTTGTATAAAATCACAACATAAGT | ATACAATGATGCCAGTTTGGTTTTCCGAAATGTC        |
| <b>SQ(817:818)AA</b>   | TTGTATAAAGCAGCACTAAGTCTACCACCGATGGG        | GACTTAGTGCTGCTTTATAACAATGATGACAGTTTGG     |
| <b>D830K</b>           | CTCGAGATAAAGTCTGAGGTTCCGGCGGTTTC           | AACCTCAGACTTTATCTCGAGTTCCCCCATCG          |
| <b>DSE(830:832)ASA</b> | GAGATAGCATCCGCAGTTCGGCGGTTTCCATTATTT       | CGAACTGCGGATGCTATCTCGAGTTCCCCCATCG        |
| <b>P837A</b>           | TCGGCGGTTTGCATTATTTTTATTCTCCAACAGGAT       | TAAAAATAATGCAAACCGCCGAACCTCAGAAT          |
| <b>LF(838:839)AA</b>   | GGTTTTCCAGCAGCATTATTCTCCAACAGGATTGCAT      | AGAATAATGCTGCTGGAAACCGCCGAACCTCA          |
| <b>LF(840:841)AA</b>   | CCATTATTTGCAGCATCCAACAGGATGCATACGTA        | TGTTGGATGCTGCAAATAATGGAAACCGCCGAAC        |
| <b>R844A</b>           | TTCTCCAACGCAATTGCATACGTACCACGTCG           | GTATGCAATTGCGTTGGAGAATAAAAAATAATGGAAA     |
| <b>IAY(845:847)AAA</b> | ACAGGGCAGCAGCAGTACCACGTCGAAAATTAGC         | GGTACTGCTGCTGCCCTGTTGGAGAATAAAAAATAATG    |
| <b>P849A</b>           | GCATACGTAGCAGTCGCAAAATTAGCACAGAA           | TTGCGACGTGCTACGTATGCAATCCTGTTGGA          |
| <b>KIK(863:865)AIA</b> | AGAAATGGCAATCGCATTGTTTGGTGAAAAATAACAGA     | AAACAATGCGATTGCCATTTCTATAATGTCATCTCTG     |
| <b>IKL(864:866)AKA</b> | AATGAAAGCAAAGGCATTTGGTGAAAAATAACAGATCA     | ACCAAATGCCTTTGCTTTTCAATTTCTATAATGTCATCTTC |
| <b>LF(866:867)AA</b>   | AAATTAAGGCAGCAGGTTGAAAAATAACAGATCAAC       | TTCCACCTGCTGCCTTAATTTTCATTTCTATAATGTCAT   |
| <b>GG(868:869)AA</b>   | AAGTTGTTTGCAGCAAAAAATAACAGATCAACAGTCACT    | GTTATTTTTGCTGCAAACAACCTTAATTTTCATTTCTATAA |
| <b>KIT(870:872)AIA</b> | GGTGGAGCAATCGCAGATCAACAGTCACTTTGTAAC       | TGATCTGCGATTGCTCCACCAAACAACCTTAATTTTCA    |
| <b>L877A</b>           | TCAACAGTCAGCATGTAACCTAATAATTATACCATATAC    | TAAGTTACATGCTGACTGTTGATCTGTTATTTTTTC      |
| <b>CN(878:879)AA</b>   | CAGTCACTTGCGCATTAATAATTATACCATATACTGATC    | TTATTAATGCTGCAAGTACTGTTGATCTGTTATTT       |
| <b>P884A</b>           | TAATAATTATAGCATATACTGATCCTATTTTGGAGAA      | GGATCAGTATATGCTATAATTATTAAGTTACAAAGTGAC   |
| <b>P888A</b>           | ATATACTGATGCAATTTTGGAGAAAGACTGCATGA        | TCCTCAAAATGTCATCAGTATATGGTATAATTATTAAG    |
| <b>KD(892:893)AA</b>   | TTTTGAGGGCAGCATGCATGAATGAGGTACACGAA        | CATGCATGCTGCCCTCAAAATAGGATCAGTATATG       |

| <b>Mutation</b>        | <b>Forward</b>                         | <b>Reverse</b>                         |
|------------------------|----------------------------------------|----------------------------------------|
| <b>PK(913:914)AA</b>   | GATACTATAGCAGCAATAGCCAGGGTCGTTGCC      | TGGCTATTGCTGCTATAGTATCAGAAGCCTTTATTTG  |
| <b>I915A</b>           | TACCGAAAGCAGCCAGGGTCGTTGCCCT           | ACCTGGCTGCTTTCGGTATAGTATCAGAAGCC       |
| <b>R917A</b>           | AAAATAGCCGCAGTCGTTGCCCTGAATGGG         | GCAACGACTGCGGCTATTTTCGGTATAGTATCA      |
| <b>PE(921:922)AA</b>   | CGTTGCCGCAGCATGGGTGGATCATTCTATTAATG    | ACCCATGCTGCGGCAACGACCCTGGCTATT         |
| <b>WV(923:924)AA</b>   | CCCCTGAAGCAGCAGATCATTCTATTAATGAAAAGTGT | ATGATCTGCTGCTTCAGGGGCAACGACCCTG        |
| <b>DHS(925:927)AHA</b> | TGGGTGGCACACGCAATTAATGAAAAGTGTCAAGTGCC | TTAATTGCGTGTGCCACCCATTCAGGGGCAACG      |
| <b>I928A</b>           | GGATCATTCTGCAAATGAAAAGTGTCAAGTGCCCTG   | GTTTTCATTTGCAGAATGATCCACCCATTCAGG      |
| <b>NCQ(931:933)ACA</b> | ATGAAGCATGCGCAGTGCCCTGAAGAAGACTTCCC    | GGCACTGCGCATGCTTCATTAATAGAATGATCCACCC  |
| <b>V934A</b>           | AACTGTCAAGCACCTGAAGAAGACTTCCCCG        | TTCTTCAGGTGCTTGACAGTTTTTCATTAATAGAATG  |
| <b>PE(935:936)AA</b>   | GTCAAGTGGCAGCAGAAGACTTCCCCGTAGTCAA     | GTCTTCTGCTGCCACTTGACAGTTTTTCATTAATAG   |
| <b>EED(936:938)KRK</b> | GTGCTAAGCGAAAGTCCCCGTAGTCAACTACTG      | GGGAAGTTTCGCTTAGGCACCTTGACAGTTTTTCATTA |
| <b>ED(937:938)AA</b>   | GCCTGAAGCAGCATTCCCCGTAGTCAACTACTG      | GGGAATGCTGCTTCAGGCACCTTGACAGTTTTTC     |
| <b>DFP(938:940)AFA</b> | GAAGAAGCATTTCGAGTAGTCAACTACTGATGGTGC   | GACTACTGCGAATGCTTCTTCAGGCACCTTGACAGTT  |
| <b>FPV(939:941)APA</b> | GAAGACGCACCAGCAGTCAACTACTGATGGTGCCT    | GTTGACTGCTGGTGCCTTCTTCAGGCACCTTGACA    |

### S3. Supplementary figures

#### Figure S1. Dnl4 BRCT screening panel

The residues affected by the mutations in Table S2 are depicted in two formats.

**(A)** Multiple sequence alignment of the Dnl4 BRCT region against selected yeasts. Mammalian species are not included due to the substantial primary sequence divergence in the region. Sc, *S. cerevisiae*; Sp, *S. paradoxus*; Sm, *S. mikatae*; Scas, *S. castellii*; Ag, *Ashbya gossypii*; Ca, *Candida albicans*. Red shading, identical among all displayed proteins; black shading, identical to Sc Dnl4; grey shading, conserved relative to Sc Dnl4.

**(B)** The same *S. cerevisiae* Dnl4 region (yDnl4) compared to human LIG4 (hLIG4), where sequences have been aligned by secondary and tertiary structure (3,4). Uppercase residues are those judged by VAST (5) to be in structural alignment. Secondary structural elements detected by Cn3D (6) are: orange, beta sheet; green, alpha helix. One conserved primary sequence motif surrounding mutation D800K is indicated: “[”, identical; “.” conserved.

In (A) and (B), blue circles mark the position of an introduced stop codon and triangles mark residues altered in at least one construct, with red triangles highlighting mutations KTT(742:744)ATA, D800K, and GG(868:869)AA studied in further detail.

< figures next pages >



Figure S1B

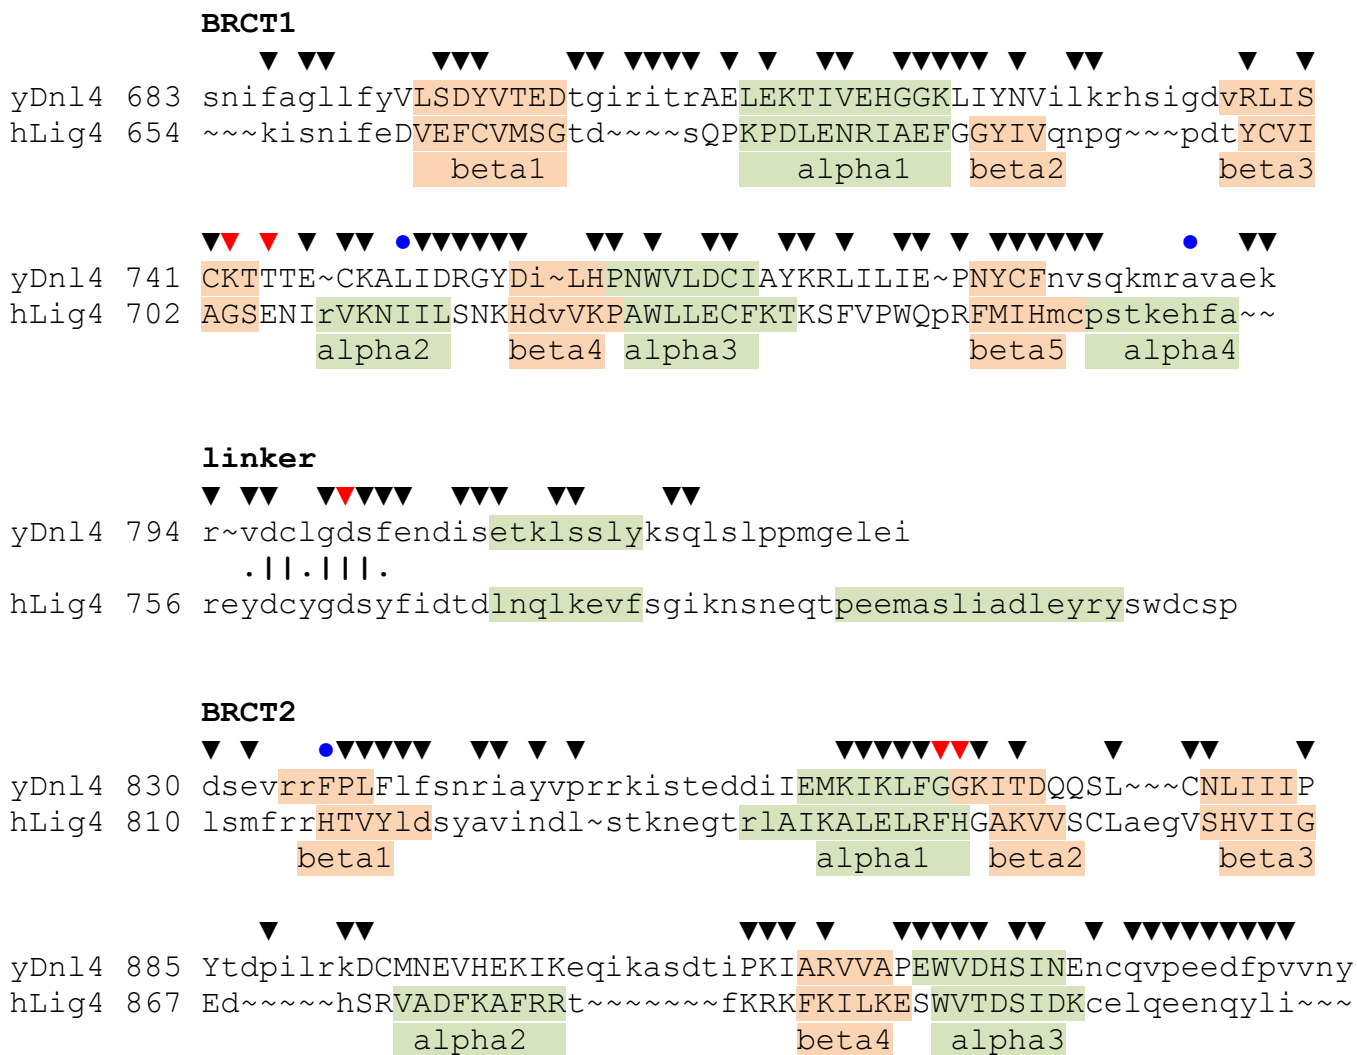

### Figure S2. BRCT screen methods

Diagram of the PCR and gap repair strategy. An asterisk represents the target mutation being created, X figures represent recombination that occurs in the yeast to assemble the intact BRCT region. Different plasmids were used for the NHEJ and two-hybrid assays. Yeast transformation mixes were grown in bulk liquid cultures without cloning for precise and imprecise NHEJ assays prior to plating as indicated. Diploid clones were obtained for two-hybrid constructs following mating to a Lif1 indicator strain and plated for scoring as indicated. A diagram of the HOSD(+1) suicide deletion NHEJ assay has been provided previously (7) (it is similar to the I-SceI assay in Figure 5A). Its key properties are that two galactose-induced HO-mediated DSBs are created in the chromosomal *ADE2* locus in a manner such that precise NHEJ yields *Ade<sup>-</sup>*/red yeast capable of growing on galactose plates while +2 imprecise NHEJ yields *Ade<sup>+</sup>*/white yeast capable of growing in the absence of adenine.

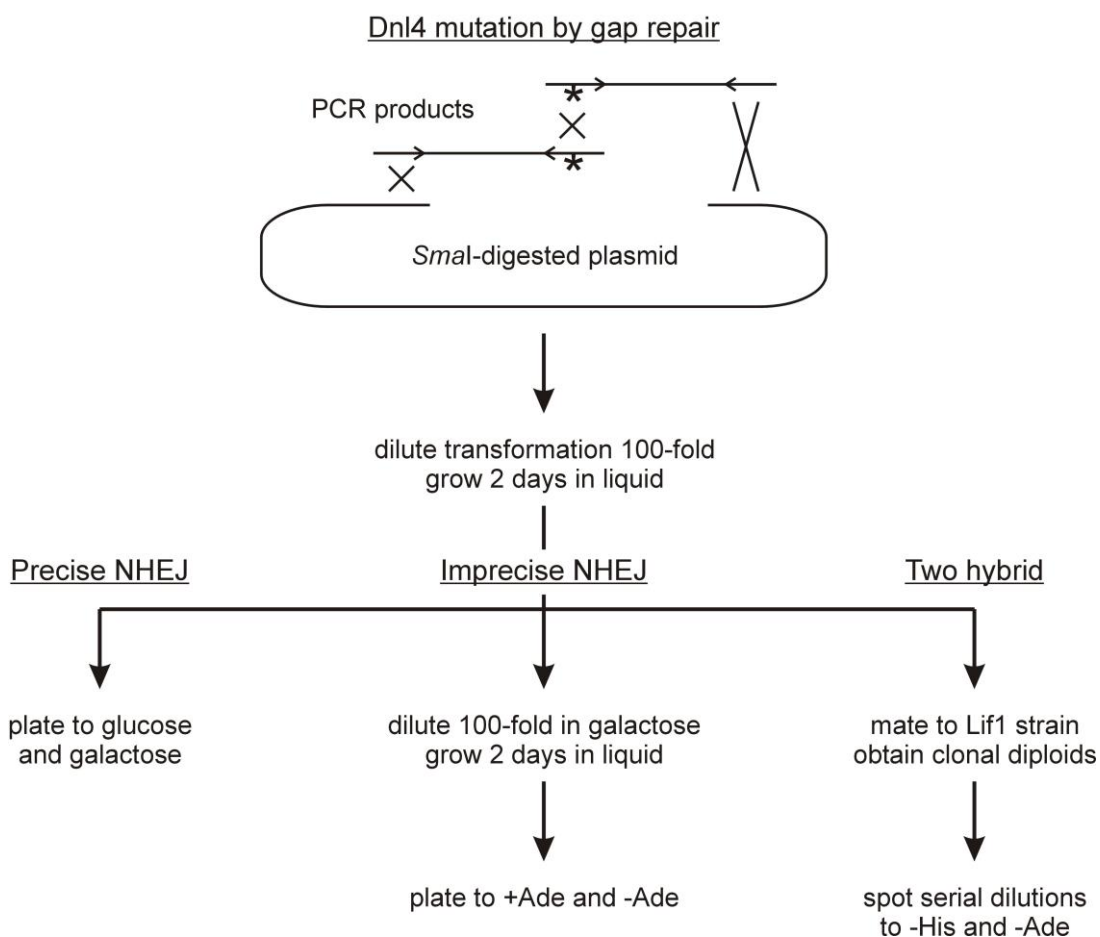

### Figure S3. BRCT screen results

The accompanying PDF file (Figure\_S3.pdf) contains one data panel for each screened mutation. Rows within a panel correspond to replicates (Rep1, etc.), with two replicates for the NHEJ measurements and three replicates for the two-hybrid measurements. Columns show colony counts for experimental (“exp”) and control (“ctl”) plates and final results expressed as % of wild-type for the precise and imprecise HOSD(+1) NHEJ assays. Increased intensity of red shading in the %wt columns provides a visual cue to samples with increased degrees of NHEJ defect. Cropped and assembled two-hybrid spot images, at two 10-fold dilutions, reveal the degree of Lif1 interaction as growth on -His and -Ade indicator plates. Occasional clonal wild-type contaminants are observed for the two-hybrid assay. The first block shows results for a control in which no primers were added to the PCR reaction, to demonstrate that the background of the screening approach was wild-type Dnl4.

< see file Figure\_S3.pdf >

### Figure S4. Correlation between precise and imprecise NHEJ

Panel showing a correlation plot and linear regression line of precise to imprecise NHEJ in the screen. Each point represents a single mutant.

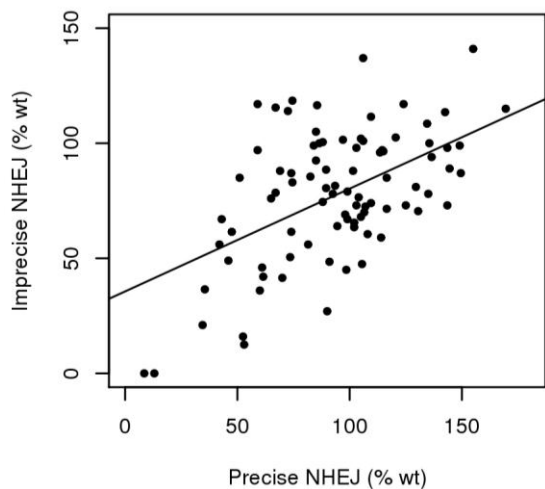

### Figure S5. Structural representation of Dnl4 BRCT mutations

**(A)** The Dnl4–Lif1 interaction interface from PDB 1Z56 [6]. The Lif1 coiled-coil (grey) and Dnl4 BRCT region (green) are depicted in ribbon diagram. The mutated Dnl4-D800 (red) and GG(868-9) (magenta) residues, as well as two Lif1 lysine residues (blue) within 5 Å of Dnl4-D800, are shown in stick form.

**(B)** Identical to (A) except in surface representation. Residues Dnl4-D800 and Lif1-KK(219-20) are still shaded red and blue, respectively, but are completely buried within the protein interface and not visible. The tight packing of Dnl4-G868 against the Lif1 coiled-coil is barely visible. A strongly disruptive influence on Dnl4-Lif1 interaction is thus predicted for Dnl4 D800K and GG(868:869)AA mutations.

**(C)** Similar to (A), zoomed out to show the entire Dnl4 BRCT region. Side chains of residues K742 and T744, altered in mutation KTT(742:744)ATA and highlighted in red, are solvent exposed and distant from the Dnl4-Lif1 interaction interface.

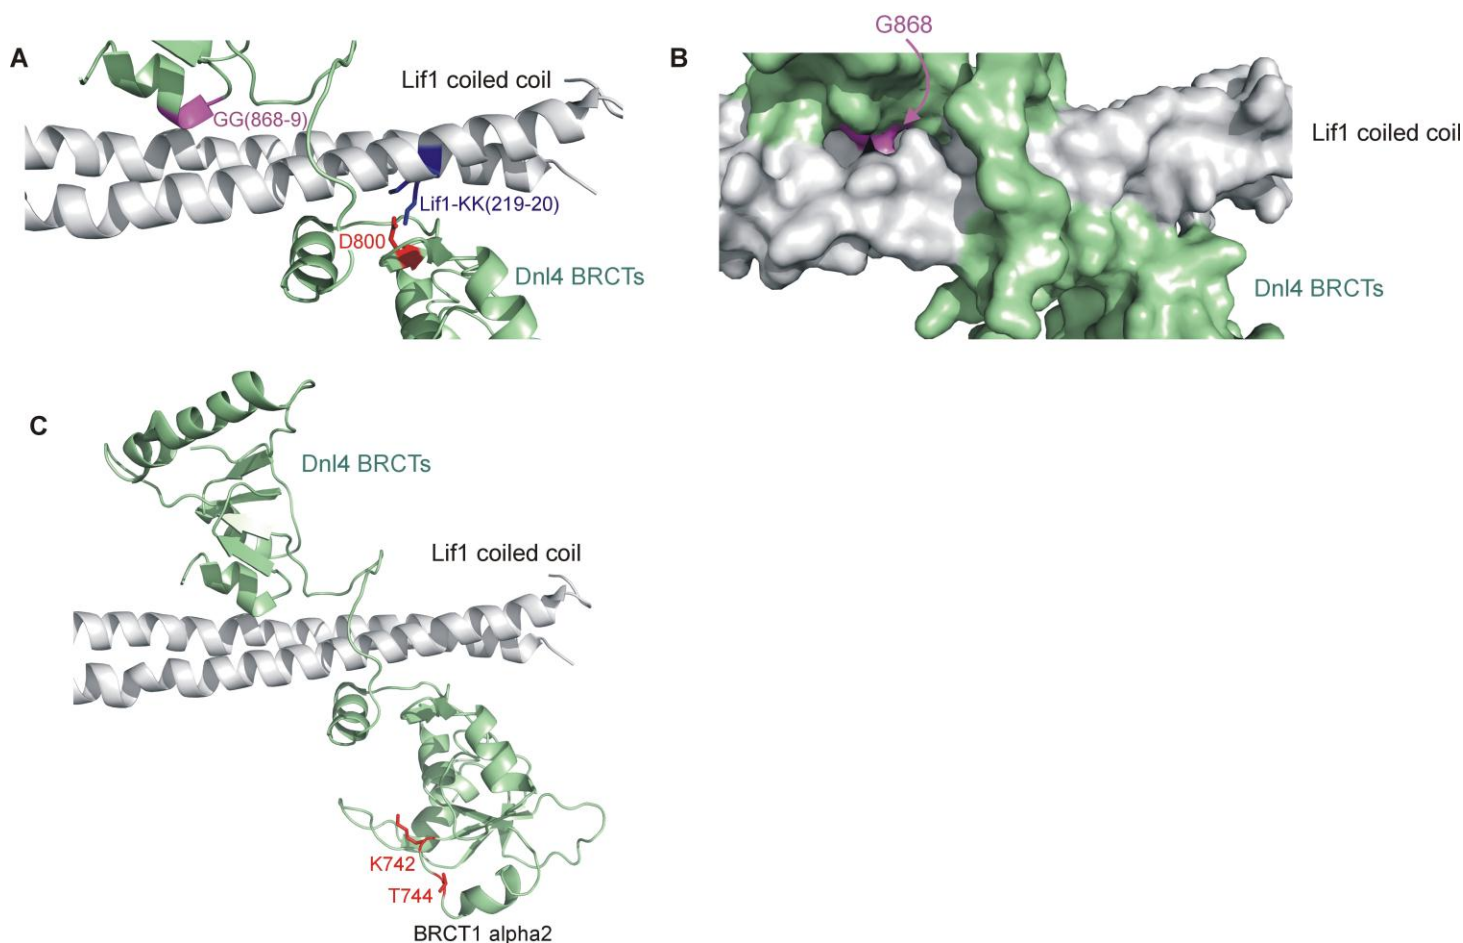



### Figure S6. Yeast two-hybrid assay control plates

(A) to (C) Panels showing the –Leu –Trp control plates for the strains from Figure 2 to demonstrate the equivalent growth of the strains without selection. Because of the *ADE2* reporter allele in the strains, a productive Dnl4-Lif1 interaction can be observed as a white colony appearance.

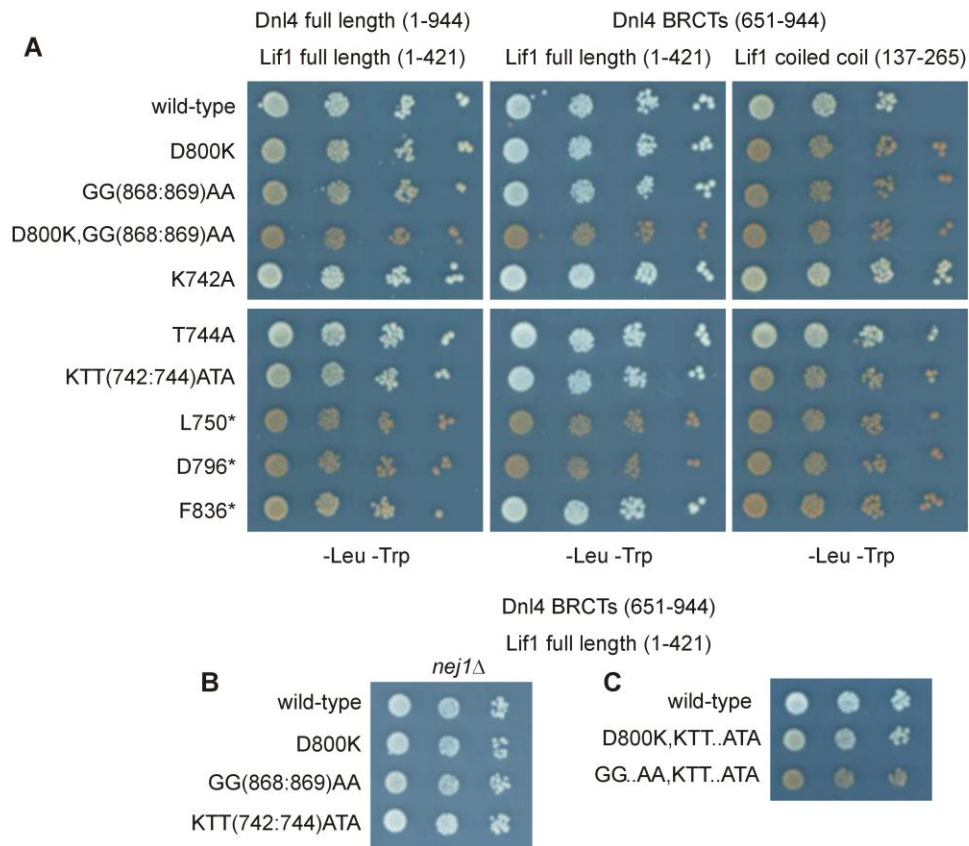

**Figure S7. Imprecise joints in the suicide deletion assay**

The sequence at the top left shows the product of precise suicide-deletion NHEJ, equivalent to an I-SceI cut site. Bold type shows the location of the 4-base 3' overhang. Subsequent lines show imprecise joints and the number of times they were observed in Dnl4 mutant strains.

Underlined bases are microhomologies, dashes indicate deleted bases, and lower case indicates inserted bases that cannot be accounted for by the DSB substrate.

| GATAAACGCGTGTATTACCCTG <b>TTAT</b> CCCTAGCGTCAGATCCTCTAGAA  | Wild-type | D800K | GG(868:869)AA |
|-------------------------------------------------------------|-----------|-------|---------------|
| GATAAACGCGTGTATTA----- <u>CCCT</u> -----AGCGTCAGATCCTCTAGAA | 6/10      | 4/10  | 4/10          |
| GATAAAC----- <u>GCGT</u> -----CAGATCCTCTAGAA                | 3/10      | 3/10  | 3/10          |
| GATAAACGCGTGTATTACCCTG <u>TTA</u> -----GCGTCAGATCCTCTAGAA   | 1/10      |       |               |
| GATAAACGCGTGTA----- <u>TAT</u> CCCTAGCGTCAGATCCTCTAGAA      |           | 1/10  |               |
| GATAAACGCGTGTATTA----- <u>C</u> -----GTCAGATCCTCTAGAA       |           |       | 1/10          |
| GA----- <u>TA</u> -----GAA                                  |           |       | 1/10          |
| GATAAA-----AGCGTCAGATCCTCTAGAA                              |           | 1/10  |               |
| GATAAACGCGTGTATTACCCTG-----GCGTCAGATCCTCTAGAA               |           |       | 1/10          |
| GATAAACGCGTGTATTACCCTGTTATt atCCCTAGCGTCAGATCCTCTAGAA       |           | 1/10  |               |

#### S4. Supplementary references

1. Chenna, R., Sugawara, H., Koike, T., Lopez, R., Gibson, T.J., Higgins, D.G. and Thompson, J.D. (2003) Multiple sequence alignment with the Clustal series of programs. *Nucleic Acids Res*, **31**, 3497-3500.
2. Schuler, G.D., Altschul, S.F. and Lipman, D.J. (1991) A workbench for multiple alignment construction and analysis. *Proteins*, **9**, 180-190.
3. Wu, P.Y., Frit, P., Meesala, S., Dauvillier, S., Modesti, M., Andres, S.N., Huang, Y., Sekiguchi, J., Calsou, P., Salles, B. *et al.* (2009) Structural and functional interaction between the human DNA repair proteins DNA ligase IV and XRCC4. *Mol. Cell. Biol.*, **29**, 3163-3172.
4. Dore, A.S., Furnham, N., Davies, O.R., Sibanda, B.L., Chirgadze, D.Y., Jackson, S.P., Pellegrini, L. and Blundell, T.L. (2006) Structure of an Xrcc4-DNA ligase IV yeast ortholog complex reveals a novel BRCT interaction mode. *DNA Repair*, **5**, 362-368.
5. Gibrat, J.F., Madej, T. and Bryant, S.H. (1996) Surprising similarities in structure comparison. *Curr. Opin. Struct. Biol.*, **6**, 377-385.
6. Wang, Y., Geer, L.Y., Chappey, C., Kans, J.A. and Bryant, S.H. (2000) Cn3D: sequence and structure views for Entrez. *Trends in Bioch. Sci.*, **25**, 300-302.
7. Palmbo, P.L., Daley, J.M. and Wilson, T.E. (2005) Mutations of the Yku80 C terminus and Xrs2 FHA domain specifically block yeast nonhomologous end joining. *Mol. Cell. Biol.*, **25**, 10782-10790.
8. Daley, J.M., Laan, R.L., Suresh, A. and Wilson, T.E. (2005) DNA joint dependence of pol X family polymerase action in nonhomologous end joining. *J. Biol. Chem.*, **280**, 29030-29037.
9. Daley, J.M. and Wilson, T.E. (2005) Rejoining of DNA double-strand breaks as a function of overhang length. *Mol. Cell. Biol.*, **25**, 896-906.
10. Uetz, P., Giot, L., Cagney, G., Mansfield, T.A., Judson, R.S., Knight, J.R., Lockshon, D., Narayan, V., Srinivasan, M., Pochart, P. *et al.* (2000) A comprehensive analysis of protein-protein interactions in *Saccharomyces cerevisiae*. *Nature*, **403**, 623-627.
11. Della, M., Palmbo, P.L., Tseng, H.M., Tonkin, L.M., Daley, J.M., Topper, L.M., Pitcher, R.S., Tomkinson, A.E., Wilson, T.E. and Doherty, A.J. (2004) Mycobacterial Ku and ligase proteins constitute a two-component NHEJ repair machine. *Science*, **306**, 683-685.
