# Supplementary material
Source: PubMed Central journal article supplement (PMC4305023)
Supplement: NIHMS635022-supplement-2.pdf [file NIHMS635022-supplement-2.pdf]

|                      |      | precise NHEJ |     |     | imprecise NHEJ |     |     | two-hybrid |      |      |      |
|----------------------|------|--------------|-----|-----|----------------|-----|-----|------------|------|------|------|
|                      |      | exp          | ctl | %wt | exp            | ctl | %wt | -Leu       | -Trp | -His | -Ade |
| primerless PCR (=wt) | Rep1 | 204          | 174 | 136 | 92             | 154 | 85  |            |      |      |      |
|                      | Rep2 | 172          | 313 | 63  | 124            | 204 | 86  |            |      |      |      |
|                      | Rep3 |              |     |     |                |     |     |            |      |      |      |
| L750L (=wt)          | Rep1 | 206          | 209 | 114 | 124            | 278 | 63  |            |      |      |      |
|                      | Rep2 | 212          | 373 | 65  | 237            | 208 | 162 |            |      |      |      |
|                      | Rep3 |              |     |     |                |     |     |            |      |      |      |
| S813S (=wt)          | Rep1 | 159          | 213 | 86  | 119            | 194 | 87  |            |      |      |      |
|                      | Rep2 | 204          | 168 | 140 | 154            | 165 | 133 |            |      |      |      |
|                      | Rep3 |              |     |     |                |     |     |            |      |      |      |
| Q875Q (=wt)          | Rep1 | 229          | 190 | 139 | 169            | 294 | 82  |            |      |      |      |
|                      | Rep2 | 150          | 334 | 52  | 130            | 261 | 71  |            |      |      |      |
|                      | Rep3 |              |     |     |                |     |     |            |      |      |      |
| L750*                | Rep1 | 22           | 225 | 11  | 0              | 264 | 0   |            |      |      |      |
|                      | Rep2 | 52           | 294 | 20  | 0              | 198 | 0   |            |      |      |      |
|                      | Rep3 |              |     |     |                |     |     |            |      |      |      |
| A789*                | Rep1 | 24           | 209 | 13  | 4              | 196 | 2   |            |      |      |      |
|                      | Rep2 | 60           | 271 | 25  | 3              | 181 | 2   |            |      |      |      |
|                      | Rep3 |              |     |     |                |     |     |            |      |      |      |
| F836*                | Rep1 | 171          | 242 | 82  | 56             | 313 | 25  |            |      |      |      |
|                      | Rep2 | 207          | 247 | 97  | 62             | 233 | 37  |            |      |      |      |
|                      | Rep3 |              |     |     |                |     |     |            |      |      |      |

|                 |      | precise NHEJ |     |     | imprecise NHEJ |     |     | two-hybrid |      |      |
|-----------------|------|--------------|-----|-----|----------------|-----|-----|------------|------|------|
|                 |      | exp          | ctl | %wt | exp            | ctl | %wt | -Leu       | -Trp | -His |
| F686A           | Rep1 | 177          | 222 | 92  | 140            | 325 | 61  |            |      |      |
|                 | Rep2 | 182          | 172 | 122 | 111            | 187 | 84  |            |      |      |
|                 | Rep3 |              |     |     |                |     |     |            |      |      |
| G688A           | Rep1 | 168          | 223 | 87  | 153            | 264 | 82  |            |      |      |
|                 | Rep2 | 302          | 301 | 116 | 121            | 183 | 94  |            |      |      |
|                 | Rep3 |              |     |     |                |     |     |            |      |      |
| L689A           | Rep1 | 186          | 173 | 124 | 99             | 228 | 61  |            |      |      |
|                 | Rep2 | 321          | 502 | 74  | 124            | 182 | 97  |            |      |      |
|                 | Rep3 |              |     |     |                |     |     |            |      |      |
| SD(695:696)AA   | Rep1 | 98           | 281 | 40  | 182            | 349 | 74  |            |      |      |
|                 | Rep2 | 216          | 541 | 46  | 108            | 254 | 60  |            |      |      |
|                 | Rep3 |              |     |     |                |     |     |            |      |      |
| Y697A           | Rep1 | 161          | 179 | 104 | 128            | 317 | 57  |            |      |      |
|                 | Rep2 | 249          | 289 | 100 | 85             | 172 | 70  |            |      |      |
|                 | Rep3 |              |     |     |                |     |     |            |      |      |
| TG(702:703)AA   | Rep1 | 13           | 150 | 10  | 2              | 207 | 1   |            |      |      |
|                 | Rep2 | 269          | 231 | 135 | 352            | 221 | 227 |            |      |      |
|                 | Rep3 |              |     |     |                |     |     |            |      |      |
| RIT(705:707)AIA | Rep1 | 192          | 253 | 88  | 0              | 0   | xxx |            |      |      |
|                 | Rep2 | 229          | 253 | 105 | 169            | 236 | 102 |            |      |      |
|                 | Rep3 |              |     |     |                |     |     |            |      |      |

|                 |      | precise NHEJ |     |     | imprecise NHEJ |     |     | two-hybrid |      |      |      |
|-----------------|------|--------------|-----|-----|----------------|-----|-----|------------|------|------|------|
|                 |      | exp          | ctl | %wt | exp            | ctl | %wt | -Leu       | -Trp | -His | -Ade |
| I706A           | Rep1 | 0            | 0   | xxx | 157            | 250 | 89  |            |      |      |      |
|                 | Rep2 | 273          | 204 | 155 | 125            | 126 | 141 |            |      |      |      |
|                 | Rep3 |              |     |     |                |     |     |            |      |      |      |
| RAE(708:710)AAA | Rep1 | 173          | 204 | 98  | 128            | 280 | 65  |            |      |      |      |
|                 | Rep2 | 305          | 246 | 143 | 151            | 153 | 140 |            |      |      |      |
|                 | Rep3 |              |     |     |                |     |     |            |      |      |      |
| E712A           | Rep1 | 288          | 210 | 159 | 224            | 355 | 90  |            |      |      |      |
|                 | Rep2 | 189          | 174 | 126 | 223            | 231 | 137 |            |      |      |      |
|                 | Rep3 |              |     |     |                |     |     |            |      |      |      |
| IV(715:716)AA   | Rep1 | 162          | 139 | 135 | 92             | 204 | 64  |            |      |      |      |
|                 | Rep2 | 267          | 248 | 124 | 119            | 173 | 98  |            |      |      |      |
|                 | Rep3 |              |     |     |                |     |     |            |      |      |      |
| GG(719:720)AA   | Rep1 | 122          | 154 | 91  | 77             | 193 | 56  |            |      |      |      |
|                 | Rep2 | 191          | 225 | 98  | 70             | 138 | 72  |            |      |      |      |
|                 | Rep3 |              |     |     |                |     |     |            |      |      |      |
| GK(720:721)AA   | Rep1 | 190          | 202 | 109 | 156            | 337 | 66  |            |      |      |      |
|                 | Rep2 | 221          | 211 | 121 | 185            | 207 | 127 |            |      |      |      |
|                 | Rep3 |              |     |     |                |     |     |            |      |      |      |
| LI(722:723)AA   | Rep1 | 186          | 192 | 112 | 80             | 265 | 43  |            |      |      |      |
|                 | Rep2 | 215          | 292 | 85  | 73             | 221 | 47  |            |      |      |      |
|                 | Rep3 |              |     |     |                |     |     |            |      |      |      |

|                 |      | precise NHEJ |     |     | imprecise NHEJ |     |     | two-hybrid |      |      |      |
|-----------------|------|--------------|-----|-----|----------------|-----|-----|------------|------|------|------|
|                 |      | exp          | ctl | %wt | exp            | ctl | %wt | -Leu       | -Trp | -His | -Ade |
| N725A           | Rep1 | 160          | 183 | 101 | 75             | 227 | 47  |            |      |      |      |
|                 | Rep2 | 242          | 221 | 127 | 108            | 215 | 71  |            |      |      |      |
|                 | Rep3 |              |     |     |                |     |     |            |      |      |      |
| L728A           | Rep1 | 168          | 158 | 123 | 139            | 244 | 81  |            |      |      |      |
|                 | Rep2 | 56           | 241 | 26  | 129            | 216 | 85  |            |      |      |      |
|                 | Rep3 |              |     |     |                |     |     |            |      |      |      |
| K729A           | Rep1 | 177          | 146 | 140 | 95             | 182 | 74  |            |      |      |      |
|                 | Rep2 | 378          | 157 | 279 | 185            | 221 | 119 |            |      |      |      |
|                 | Rep3 |              |     |     |                |     |     |            |      |      |      |
| R737A           | Rep1 | 183          | 195 | 108 | 112            | 286 | 55  |            |      |      |      |
|                 | Rep2 | 359          | 229 | 181 | 201            | 232 | 123 |            |      |      |      |
|                 | Rep3 |              |     |     |                |     |     |            |      |      |      |
| SC(740:741)AA   | Rep1 | 0            | 0   | xxx | 26             | 252 | 14  |            |      |      |      |
|                 | Rep2 | 197          | 183 | 124 | 215            | 261 | 117 |            |      |      |      |
|                 | Rep3 |              |     |     |                |     |     |            |      |      |      |
| K742E           | Rep1 | 73           | 203 | 41  | 131            | 339 | 55  |            |      |      |      |
|                 | Rep2 | 91           | 349 | 30  | 29             | 221 | 18  |            |      |      |      |
|                 | Rep3 |              |     |     |                |     |     |            |      |      |      |
| KTT(742:744)ATA | Rep1 | 14           | 204 | 7   | 0              | 326 | 0   |            |      |      |      |
|                 | Rep2 | 24           | 275 | 10  | 0              | 211 | 0   |            |      |      |      |
|                 | Rep3 |              |     |     |                |     |     |            |      |      |      |

|                 |      | precise NHEJ |     |     | imprecise NHEJ |     |     | two-hybrid |      |      |      |
|-----------------|------|--------------|-----|-----|----------------|-----|-----|------------|------|------|------|
|                 |      | exp          | ctl | %wt | exp            | ctl | %wt | -Leu       | -Trp | -His | -Ade |
| EC(746:747)AA   | Rep1 | 84           | 225 | 43  | 81             | 314 | 36  |            |      |      |      |
|                 | Rep2 | 67           | 189 | 41  | 112            | 210 | 76  |            |      |      |      |
|                 | Rep3 |              |     |     |                |     |     |            |      |      |      |
| CK(747:748)AA   | Rep1 | 216          | 129 | 194 | 148            | 359 | 58  |            |      |      |      |
|                 | Rep2 | 157          | 467 | 39  | 169            | 214 | 112 |            |      |      |      |
|                 | Rep3 |              |     |     |                |     |     |            |      |      |      |
| LI(750:751)AA   | Rep1 | 18           | 181 | 11  | 0              | 283 | 0   |            |      |      |      |
|                 | Rep2 | 34           | 251 | 15  | 0              | 186 | 0   |            |      |      |      |
|                 | Rep3 |              |     |     |                |     |     |            |      |      |      |
| DR(752:753)AA   | Rep1 | 182          | 229 | 92  | 136            | 294 | 66  |            |      |      |      |
|                 | Rep2 | 240          | 231 | 120 | 191            | 200 | 136 |            |      |      |      |
|                 | Rep3 |              |     |     |                |     |     |            |      |      |      |
| R753E           | Rep1 | 175          | 191 | 106 | 126            | 213 | 84  |            |      |      |      |
|                 | Rep2 | 25           | 170 | 17  | 0              | 202 | 0   |            |      |      |      |
|                 | Rep3 |              |     |     |                |     |     |            |      |      |      |
| GYD(754:756)AYA | Rep1 | 162          | 74  | 254 | 147            | 248 | 84  |            |      |      |      |
|                 | Rep2 | 173          | 234 | 85  | 207            | 202 | 146 |            |      |      |      |
|                 | Rep3 |              |     |     |                |     |     |            |      |      |      |
| Y755A           | Rep1 | 121          | 241 | 58  | 133            | 374 | 50  |            |      |      |      |
|                 | Rep2 | 125          | 241 | 60  | 251            | 248 | 144 |            |      |      |      |
|                 | Rep3 |              |     |     |                |     |     |            |      |      |      |

|               |      | precise NHEJ |     |     | imprecise NHEJ |     |     | two-hybrid |      |      |
|---------------|------|--------------|-----|-----|----------------|-----|-----|------------|------|------|
|               |      | exp          | ctl | %wt | exp            | ctl | %wt | -Leu       | -Trp | -His |
| D756K         | Rep1 | 119          | 165 | 83  | 79             | 361 | 31  |            |      |      |
|               | Rep2 | 254          | 230 | 128 | 111            | 245 | 64  |            |      |      |
|               | Rep3 |              |     |     |                |     |     |            |      |      |
| HP(759:760)AA | Rep1 | 206          | 140 | 170 | 91             | 239 | 54  |            |      |      |
|               | Rep2 | 21           | 228 | 10  | 0              | 350 | 0   |            |      |      |
|               | Rep3 |              |     |     |                |     |     |            |      |      |
| W762A         | Rep1 | 163          | 166 | 113 | 135            | 274 | 70  |            |      |      |
|               | Rep2 | 284          | 205 | 160 | 188            | 226 | 118 |            |      |      |
|               | Rep3 |              |     |     |                |     |     |            |      |      |
| D765K         | Rep1 | 241          | 228 | 122 | 190            | 309 | 87  |            |      |      |
|               | Rep2 | 202          | 258 | 90  | 219            | 167 | 187 |            |      |      |
|               | Rep3 |              |     |     |                |     |     |            |      |      |
| DC(765:766)AA | Rep1 | 198          | 204 | 112 | 129            | 257 | 71  |            |      |      |
|               | Rep2 | 148          | 294 | 58  | 161            | 165 | 139 |            |      |      |
|               | Rep3 |              |     |     |                |     |     |            |      |      |
| Y769A         | Rep1 | 263          | 205 | 148 | 125            | 301 | 59  |            |      |      |
|               | Rep2 | 129          | 209 | 71  | 108            | 172 | 89  |            |      |      |
|               | Rep3 |              |     |     |                |     |     |            |      |      |
| K770A         | Rep1 | 200          | 205 | 113 | 158            | 316 | 71  |            |      |      |
|               | Rep2 | 166          | 230 | 83  | 101            | 212 | 67  |            |      |      |
|               | Rep3 |              |     |     |                |     |     |            |      |      |

|                 |      | precise NHEJ |     |     | imprecise NHEJ |     |     | two-hybrid |      |      |      |
|-----------------|------|--------------|-----|-----|----------------|-----|-----|------------|------|------|------|
|                 |      | exp          | ctl | %wt | exp            | ctl | %wt | -Leu       | -Trp | -His | -Ade |
| L772A           | Rep1 | 211          | 156 | 156 | 101            | 241 | 59  |            |      |      |      |
|                 | Rep2 | 144          | 227 | 73  | 143            | 151 | 135 |            |      |      |      |
|                 | Rep3 |              |     |     |                |     |     |            |      |      |      |
| I775A           | Rep1 | 172          | 182 | 109 | 65             | 168 | 55  |            |      |      |      |
|                 | Rep2 | 124          | 203 | 70  | 161            | 216 | 106 |            |      |      |      |
|                 | Rep3 |              |     |     |                |     |     |            |      |      |      |
| E776K           | Rep1 | 170          | 241 | 81  | 151            | 233 | 92  |            |      |      |      |
|                 | Rep2 | 223          | 297 | 87  | 188            | 253 | 106 |            |      |      |      |
|                 | Rep3 |              |     |     |                |     |     |            |      |      |      |
| EP(776:777)AA   | Rep1 | 161          | 167 | 111 | 96             | 137 | 99  |            |      |      |      |
|                 | Rep2 | 129          | 229 | 65  | 140            | 195 | 102 |            |      |      |      |
|                 | Rep3 |              |     |     |                |     |     |            |      |      |      |
| YCF(779:781)ACA | Rep1 | 170          | 193 | 102 | 99             | 186 | 75  |            |      |      |      |
|                 | Rep2 | 130          | 164 | 92  | 157            | 174 | 128 |            |      |      |      |
|                 | Rep3 |              |     |     |                |     |     |            |      |      |      |
| CFN(780:782)AFA | Rep1 | 147          | 168 | 101 | 131            | 190 | 98  |            |      |      |      |
|                 | Rep2 | 103          | 164 | 72  | 129            | 179 | 102 |            |      |      |      |
|                 | Rep3 |              |     |     |                |     |     |            |      |      |      |
| FNV(781:783)ANA | Rep1 | 185          | 136 | 157 | 143            | 174 | 117 |            |      |      |      |
|                 | Rep2 | 179          | 184 | 112 | 142            | 202 | 100 |            |      |      |      |
|                 | Rep3 |              |     |     |                |     |     |            |      |      |      |

|                 |      | precise NHEJ |     |     | imprecise NHEJ |     |     | two-hybrid |      |      |      |
|-----------------|------|--------------|-----|-----|----------------|-----|-----|------------|------|------|------|
|                 |      | exp          | ctl | %wt | exp            | ctl | %wt | -Leu       | -Trp | -His | -Ade |
| NVS(782:784)AVA | Rep1 | 213          | 171 | 144 | 146            | 169 | 123 |            |      |      |      |
|                 | Rep2 | 128          | 198 | 75  | 138            | 196 | 100 |            |      |      |      |
|                 | Rep3 |              |     |     |                |     |     |            |      |      |      |
| EK(792:793)AA   | Rep1 | 169          | 145 | 135 | 140            | 246 | 81  |            |      |      |      |
|                 | Rep2 | 210          | 550 | 44  | 160            | 236 | 96  |            |      |      |      |
|                 | Rep3 |              |     |     |                |     |     |            |      |      |      |
| RVD(794:796)AVA | Rep1 | 56           | 231 | 28  | 26             | 265 | 13  |            |      |      |      |
|                 | Rep2 | 101          | 281 | 41  | 48             | 232 | 29  |            |      |      |      |
|                 | Rep3 |              |     |     |                |     |     |            |      |      |      |
| V795A           | Rep1 | 240          | 204 | 136 | 129            | 154 | 119 |            |      |      |      |
|                 | Rep2 | 239          | 183 | 151 | 132            | 242 | 77  |            |      |      |      |
|                 | Rep3 |              |     |     |                |     |     |            |      |      |      |
| D796K           | Rep1 | 190          | 197 | 111 | 72             | 297 | 34  |            |      |      |      |
|                 | Rep2 | 154          | 251 | 71  | 96             | 215 | 63  |            |      |      |      |
|                 | Rep3 |              |     |     |                |     |     |            |      |      |      |
| GD(799:800)AA   | Rep1 | 170          | 189 | 104 | 93             | 332 | 39  |            |      |      |      |
|                 | Rep2 | 177          | 467 | 43  | 100            | 230 | 62  |            |      |      |      |
|                 | Rep3 |              |     |     |                |     |     |            |      |      |      |
| D800K           | Rep1 | 127          | 167 | 88  | 95             | 325 | 41  |            |      |      |      |
|                 | Rep2 | 151          | 507 | 34  | 56             | 154 | 51  |            |      |      |      |
|                 | Rep3 |              |     |     |                |     |     |            |      |      |      |



|                 |      | precise NHEJ |     |     | imprecise NHEJ |     |     | two-hybrid |      |      |
|-----------------|------|--------------|-----|-----|----------------|-----|-----|------------|------|------|
|                 |      | exp          | ctl | %wt | exp            | ctl | %wt | -Leu       | -Trp | -His |
| SFE(801:803)AFA | Rep1 | 173          | 209 | 96  | 126            | 219 | 82  |            |      |      |
|                 | Rep2 | 242          | 534 | 52  | 121            | 186 | 92  |            |      |      |
|                 | Rep3 |              |     |     |                |     |     |            |      |      |
| F802A           | Rep1 | 218          | 186 | 136 | 147            | 223 | 94  |            |      |      |
|                 | Rep2 | 157          | 351 | 51  | 185            | 381 | 69  |            |      |      |
|                 | Rep3 |              |     |     |                |     |     |            |      |      |
| I806A           | Rep1 | 159          | 258 | 71  | 111            | 163 | 97  |            |      |      |
|                 | Rep2 | 177          | 131 | 156 | 140            | 209 | 95  |            |      |      |
|                 | Rep3 |              |     |     |                |     |     |            |      |      |
| SE(807:808)AA   | Rep1 | 153          | 219 | 81  | 115            | 285 | 57  |            |      |      |
|                 | Rep2 | 220          | 151 | 169 | 139            | 221 | 89  |            |      |      |
|                 | Rep3 |              |     |     |                |     |     |            |      |      |
| L811A           | Rep1 | 305          | 194 | 182 | 124            | 275 | 64  |            |      |      |
|                 | Rep2 | 195          | 193 | 117 | 132            | 171 | 110 |            |      |      |
|                 | Rep3 |              |     |     |                |     |     |            |      |      |
| S812A           | Rep1 | 226          | 147 | 178 | 117            | 272 | 61  |            |      |      |
|                 | Rep2 | 181          | 192 | 109 | 113            | 188 | 85  |            |      |      |
|                 | Rep3 |              |     |     |                |     |     |            |      |      |
| SQ(817:818)AA   | Rep1 | 219          | 166 | 153 | 143            | 242 | 84  |            |      |      |
|                 | Rep2 | 260          | 207 | 145 | 136            | 169 | 114 |            |      |      |
|                 | Rep3 |              |     |     |                |     |     |            |      |      |

|                 |      | precise NHEJ |     |     | imprecise NHEJ |     |     | two-hybrid |      |      |
|-----------------|------|--------------|-----|-----|----------------|-----|-----|------------|------|------|
|                 |      | exp          | ctl | %wt | exp            | ctl | %wt | -Leu       | -Trp | -His |
| D830K           | Rep1 | 266          | 191 | 161 | 122            | 304 | 57  |            |      |      |
|                 | Rep2 | 176          | 186 | 109 | 229            | 327 | 99  |            |      |      |
|                 | Rep3 |              |     |     |                |     |     |            |      |      |
| DSE(830:832)ASA | Rep1 | 212          | 205 | 120 | 208            | 282 | 105 |            |      |      |
|                 | Rep2 | 160          | 364 | 51  | 212            | 236 | 128 |            |      |      |
|                 | Rep3 |              |     |     |                |     |     |            |      |      |
| P837A           | Rep1 | 190          | 168 | 131 | 117            | 321 | 52  |            |      |      |
|                 | Rep2 | 203          | 319 | 73  | 178            | 321 | 79  |            |      |      |
|                 | Rep3 |              |     |     |                |     |     |            |      |      |
| LF(838:839)AA   | Rep1 | 227          | 195 | 135 | 184            | 345 | 76  |            |      |      |
|                 | Rep2 | 221          | 188 | 136 | 289            | 330 | 124 |            |      |      |
|                 | Rep3 |              |     |     |                |     |     |            |      |      |
| LF(840:841)AA   | Rep1 | 69           | 189 | 42  | 53             | 311 | 24  |            |      |      |
|                 | Rep2 | 205          | 376 | 63  | 19             | 330 | 8   |            |      |      |
|                 | Rep3 |              |     |     |                |     |     |            |      |      |
| R844A           | Rep1 | 199          | 232 | 99  | 129            | 281 | 65  |            |      |      |
|                 | Rep2 | 110          | 260 | 49  | 84             | 205 | 58  |            |      |      |
|                 | Rep3 |              |     |     |                |     |     |            |      |      |
| IAY(845:847)AAA | Rep1 | 168          | 267 | 73  | 152            | 348 | 62  |            |      |      |
|                 | Rep2 | 142          | 288 | 57  | 181            | 284 | 90  |            |      |      |
|                 | Rep3 |              |     |     |                |     |     |            |      |      |

|                 |      | precise NHEJ |     |     | imprecise NHEJ |     |     | two-hybrid                                                                            |                                                                                       |                                                                                       |
|-----------------|------|--------------|-----|-----|----------------|-----|-----|---------------------------------------------------------------------------------------|---------------------------------------------------------------------------------------|---------------------------------------------------------------------------------------|
|                 |      | exp          | ctl | %wt | exp            | ctl | %wt | -Leu                                                                                  | -Trp                                                                                  | -His                                                                                  |
| P849A           | Rep1 | 196          | 151 | 150 | 148            | 300 | 70  |    |    |    |
|                 | Rep2 | 205          | 214 | 111 | 127            | 252 | 71  |    |    |    |
|                 | Rep3 |              |     |     |                |     |     |    |    |    |
| KIK(863:865)AIA | Rep1 | 182          | 274 | 77  | 132            | 283 | 66  |    |    |    |
|                 | Rep2 | 115          | 232 | 57  | 112            | 174 | 91  |    |    |    |
|                 | Rep3 |              |     |     |                |     |     |   |   |   |
| IKL(864:866)AKA | Rep1 | 278          | 260 | 124 | 145            | 262 | 78  |    |    |    |
|                 | Rep2 | 166          | 234 | 82  | 125            | 151 | 118 |   |   |   |
|                 | Rep3 |              |     |     |                |     |     |  |  |  |
| LF(866:867)AA   | Rep1 | 205          | 291 | 81  | 72             | 210 | 48  |   |   |   |
|                 | Rep2 | 184          | 258 | 82  | 151            | 332 | 64  |  |  |  |
|                 | Rep3 |              |     |     |                |     |     |  |  |  |
| GG(868:869)AA   | Rep1 | 126          | 310 | 47  | 138            | 288 | 68  |  |  |  |
|                 | Rep2 | 137          | 287 | 55  | 204            | 284 | 102 |  |  |  |
|                 | Rep3 |              |     |     |                |     |     |  |  |  |
| KIT(870:872)AIA | Rep1 | 209          | 211 | 114 | 98             | 215 | 65  |  |  |  |
|                 | Rep2 | 168          | 210 | 92  | 235            | 409 | 81  |  |  |  |
|                 | Rep3 |              |     |     |                |     |     |  |  |  |
| L877A           | Rep1 | 241          | 188 | 148 | 145            | 320 | 64  |  |  |  |
|                 | Rep2 | 164          | 223 | 85  | 146            | 263 | 79  |  |  |  |
|                 | Rep3 |              |     |     |                |     |     |  |  |  |

|               |      | precise NHEJ |     |     | imprecise NHEJ |     |     | two-hybrid |      |      |
|---------------|------|--------------|-----|-----|----------------|-----|-----|------------|------|------|
|               |      | exp          | ctl | %wt | exp            | ctl | %wt | -Leu       | -Trp | -His |
| CN(878:879)AA | Rep1 | 217          | 173 | 145 | 110            | 261 | 60  |            |      |      |
|               | Rep2 | 146          | 237 | 71  | 102            | 237 | 61  |            |      |      |
|               | Rep3 |              |     |     |                |     |     |            |      |      |
| P884A         | Rep1 | 176          | 213 | 95  | 97             | 235 | 58  |            |      |      |
|               | Rep2 | 156          | 159 | 113 | 140            | 209 | 95  |            |      |      |
|               | Rep3 |              |     |     |                |     |     |            |      |      |
| P888A         | Rep1 | 148          | 168 | 102 | 0              | 0   | xxx |            |      |      |
|               | Rep2 | 156          | 304 | 59  | 155            | 189 | 117 |            |      |      |
|               | Rep3 |              |     |     |                |     |     |            |      |      |
| KD(892:893)AA | Rep1 | 180          | 204 | 102 | 122            | 264 | 65  |            |      |      |
|               | Rep2 | 182          | 309 | 68  | 128            | 152 | 120 |            |      |      |
|               | Rep3 |              |     |     |                |     |     |            |      |      |
| PK(913:914)AA | Rep1 | 170          | 163 | 121 | 107            | 265 | 57  |            |      |      |
|               | Rep2 | 149          | 223 | 77  | 107            | 197 | 77  |            |      |      |
|               | Rep3 |              |     |     |                |     |     |            |      |      |
| I915A         | Rep1 | 184          | 219 | 97  | 90             | 217 | 59  |            |      |      |
|               | Rep2 | 183          | 402 | 52  | 245            | 196 | 178 |            |      |      |
|               | Rep3 |              |     |     |                |     |     |            |      |      |
| R917A         | Rep1 | 244          | 201 | 140 | 153            | 274 | 79  |            |      |      |
|               | Rep2 | 0            | 196 | 0   | 11             | 331 | 4   |            |      |      |
|               | Rep3 |              |     |     |                |     |     |            |      |      |

|                 |      | precise NHEJ |     |     | imprecise NHEJ |     |     | two-hybrid |      |      |
|-----------------|------|--------------|-----|-----|----------------|-----|-----|------------|------|------|
|                 |      | exp          | ctl | %wt | exp            | ctl | %wt | -Leu       | -Trp | -His |
| PE(921:922)AA   | Rep1 | 264          | 208 | 147 | 141            | 329 | 61  |            |      |      |
|                 | Rep2 | 151          | 278 | 63  | 151            | 284 | 75  |            |      |      |
|                 | Rep3 |              |     |     |                |     |     |            |      |      |
| WV(923:924)AA   | Rep1 | 105          | 222 | 54  | 25             | 280 | 12  |            |      |      |
|                 | Rep2 | 108          | 241 | 52  | 21             | 226 | 13  |            |      |      |
|                 | Rep3 |              |     |     |                |     |     |            |      |      |
| DHS(925:927)AHA | Rep1 | 243          | 263 | 107 | 135            | 314 | 61  |            |      |      |
|                 | Rep2 | 127          | 212 | 69  | 147            | 237 | 88  |            |      |      |
|                 | Rep3 |              |     |     |                |     |     |            |      |      |
| I928A           | Rep1 | 235          | 200 | 136 | 103            | 280 | 52  |            |      |      |
|                 | Rep2 | 164          | 247 | 77  | 139            | 225 | 88  |            |      |      |
|                 | Rep3 |              |     |     |                |     |     |            |      |      |
| NCQ(931:933)ACA | Rep1 | 201          | 204 | 114 | 119            | 254 | 66  |            |      |      |
|                 | Rep2 | 152          | 248 | 71  | 97             | 153 | 90  |            |      |      |
|                 | Rep3 |              |     |     |                |     |     |            |      |      |
| V934A           | Rep1 | 21           | 141 | 17  | 8              | 117 | 9   |            |      |      |
|                 | Rep2 | 130          | 201 | 75  | 221            | 351 | 89  |            |      |      |
|                 | Rep3 |              |     |     |                |     |     |            |      |      |
| PE(935:936)AA   | Rep1 | 185          | 222 | 96  | 129            | 296 | 62  |            |      |      |
|                 | Rep2 | 108          | 325 | 38  | 237            | 200 | 169 |            |      |      |
|                 | Rep3 |              |     |     |                |     |     |            |      |      |

|                 |      | precise NHEJ |     |     | imprecise NHEJ |     |     | two-hybrid |      |      |
|-----------------|------|--------------|-----|-----|----------------|-----|-----|------------|------|------|
|                 |      | exp          | ctl | %wt | exp            | ctl | %wt | -Leu       | -Trp | -His |
| EED(936:938)KRK | Rep1 | 172          | 252 | 79  | 84             | 237 | 50  |            |      |      |
|                 | Rep2 | 105          | 294 | 41  | 38             | 241 | 22  |            |      |      |
|                 | Rep3 |              |     |     |                |     |     |            |      |      |
| ED(937:938)AA   | Rep1 | 219          | 450 | 56  | 91             | 209 | 62  |            |      |      |
|                 | Rep2 | 67           | 195 | 39  | 106            | 246 | 61  |            |      |      |
|                 | Rep3 |              |     |     |                |     |     |            |      |      |
| DFP(938:940)AFA | Rep1 | 198          | 202 | 113 | 121            | 208 | 83  |            |      |      |
|                 | Rep2 | 130          | 285 | 52  | 183            | 296 | 88  |            |      |      |
|                 | Rep3 |              |     |     |                |     |     |            |      |      |
| FPV(939:941)APA | Rep1 | 171          | 263 | 75  | 0              | 0   | xxx |            |      |      |
|                 | Rep2 | 159          | 265 | 69  | 186            | 301 | 88  |            |      |      |
|                 | Rep3 |              |     |     |                |     |     |            |      |      |
